# Supplementary material for: Utilizing a compact diamino-based ligand as a charge balancer in quantum dot light-emitting diodes
Source: Royal Society of Chemistry journal article supplement (doi:10.1039/d4na00348a), 2024-01-01
Supplement: d4na00348a1.pdf [file d4na00348a1.pdf]

## Supporting Information

### **Utilizing a Compact Diamino-Based Ligand as a Charge Balancer in Quantum Dot Light-Emitting Diodes**

*Minseok Choi, Woon Ho Jung, Jaeyeop Lee, Yeyun Bae, Kyoung-eun Lee, Jiyeon Oh, Jaehoon Lim, Seunghyun Rhee\**  
*and Jeongkyun Roh\**

*M. Choi, J. Lee, Y. Bae, K. Lee, J. Oh, J. Roh*

Dept. of Electrical Engineering, Pusan National University, Busan 46241, Republic of Korea

*W. H. Jung, J. Lim*

Dept. of Energy Science and Center for Artificial Atoms, Sungkyunkwan University, Suwon, Gyeonggi-do  
16419, Republic of Korea

*J. Lim*

SKKU Institute of Energy Science and Technology (SIEST), Sungkyunkwan University, Suwon, Gyeonggi-do  
16419, Republic of Korea

Department of Future Energy Engineering (DFEE), Sungkyunkwan University, Suwon, Gyeonggi-do 16419,  
Republic of Korea

*S. Rhee*

*Korea Research Institute of Chemical Technology (KRICT), Daejeon 34114, Republic of Korea*

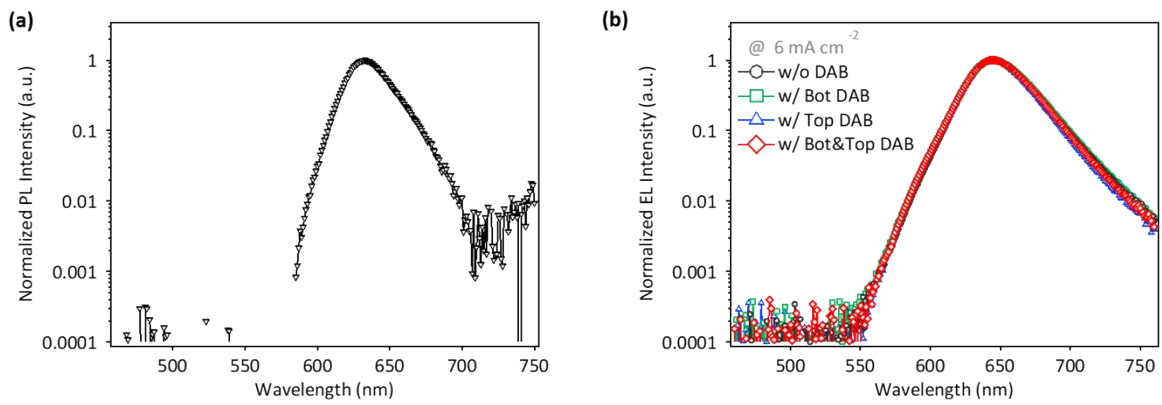

**Figure S1.** (a) Photoluminescence of QD and electroluminescence spectra of QD-LEDs with and without DAB treatment in log scale.

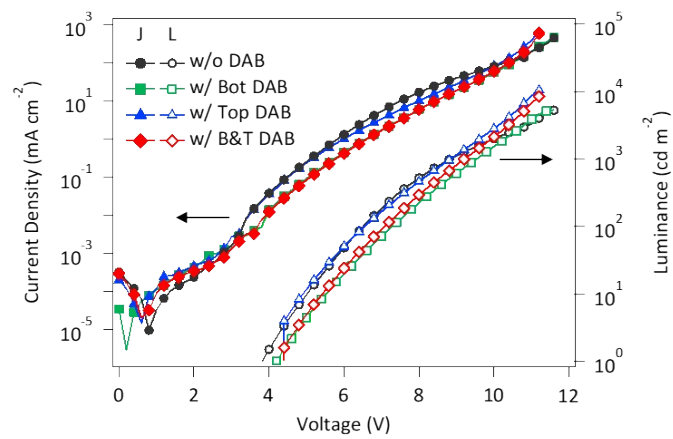

**Figure S2.** A log-linear plot of current density-voltage-luminance curves of QD-LEDs with and without DAB treatment.

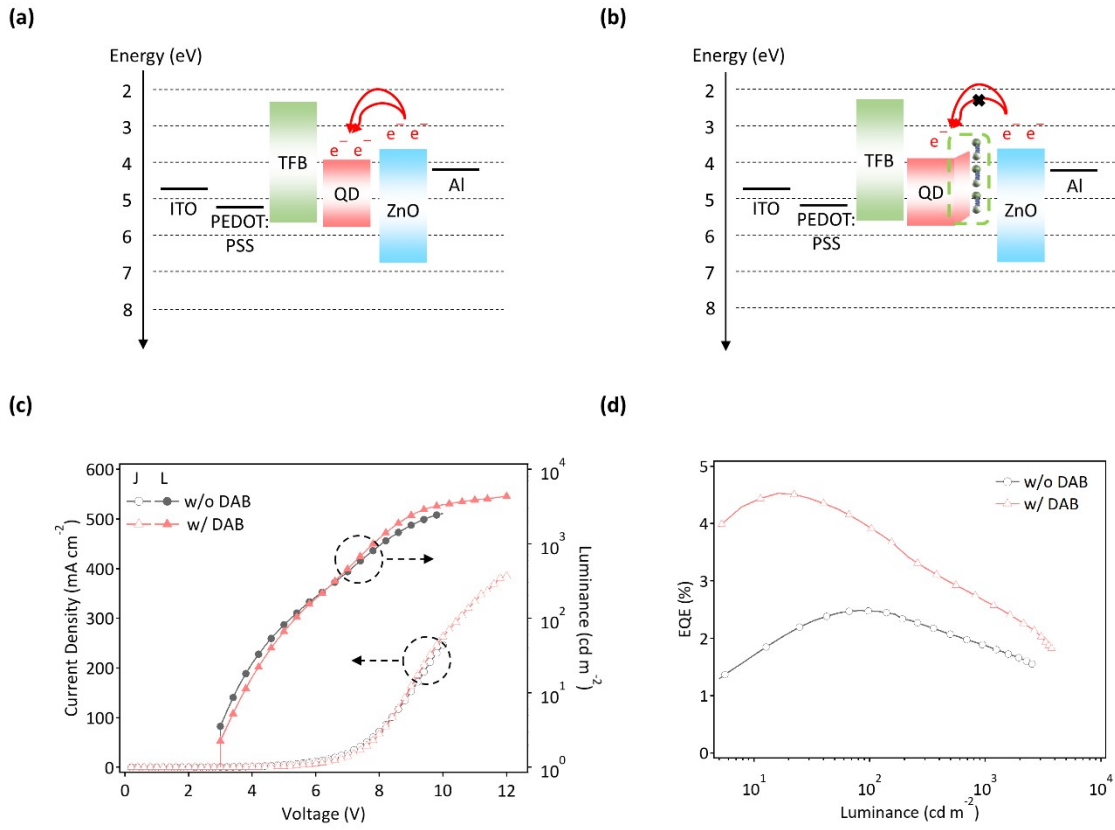

**Figure S3.** Electrical properties of conventional structure of QD-LEDs. Operation structure of QD-LEDs (a) without DAB ligands and (b) with DAB ligands. (c) Current density – voltage – luminance and (d) EQE – luminance characteristic of QD-LEDs without DAB ligands (black circle), with DAB ligands (red triangle).

**Table S1.** Performance summary of conventional structure QD-LEDs with DAB treatment

| Method  | $V_{on}$<br>(at $1 \text{ cd} \cdot \text{m}^{-2}$ ) | Max PE<br>( $\text{lm} \cdot \text{W}^{-1}$ ) | Max CE<br>( $\text{cd} \cdot \text{A}^{-1}$ ) | Max EQE<br>(%) |
|---------|------------------------------------------------------|-----------------------------------------------|-----------------------------------------------|----------------|
| w/o DAB | 2.8                                                  | 1.22                                          | 2.46                                          | 2.48           |
| w/ DAB  | 2.9                                                  | 2.67                                          | 2.62                                          | 4.5            |
